# Supplementary material for: Expression Profile of Defense Genes in Rice Lines Pyramided with Resistance Genes Against Bacterial Blight, Fungal Blast and Insect Gall Midge
Source: Rice (N Y). 2018 Jul 13;11:40. doi: 10.1186/s12284-018-0231-4 (PMC6045563; doi:10.1186/s12284-018-0231-4)
Supplement: Supplementary file 1 — Table S1. Phenotypic evaluation of the 11 test lines against non-target pests in greenhouse and field tests. (XLSX 12 kb) [file 12284_2018_231_MOESM1_ESM.xlsx]

## Sheet: Non Target pest
Table S2: Reaction of test lines against non-target pests
A.	Sheath blight (ShB) under greenhouse screening at ICAR-IIRR
		Sheath Blight (Lesion Length (cm))
		2016		2017
S.NO	Test lines	Mean ± SE	Rating	Mean ± SE	Rating
1	RPNF-01		T	65.0 ± 2.6	S
2	RPNF-02		HS	NT
3	RPNF-03		T	55.0 ± 3.6	S
4	RPNF-04		T	46.0 ± 3.8	S
5	RPNF-05		T	56.0 ± 2.4	S
6	RPNF-06		T	60.0 ± 2.9	S
7	RPNF-07		S	NT
8	RPNF-08		S	NT
9	RPNF-09		T	63.0 ± 2.9	S
10	RPNF-10		T	NT
11	RPNF-11		HS	NT
B	Rice tungro virus (RTV) under greenhouse screening at ICAR-IIRR
		RTV
		2016
S.NO	Test lines	Score	Rating
1	RPNF-01	7	S
2	RPNF-02	7	S
3	RPNF-03	7	S
4	RPNF-04	7	S
5	RPNF-05	7	S
6	RPNF-06	7	S
7	RPNF-07	7	S
8	RPNF-08	7	S
9	RPNF-09	7	S
10	RPNF-10	7	S
11	RPNF-11	7	S
C	Brown planthopper (BPH) under greenhouse screening at ABF
		BPH (Damage score)
		2016		2017
S.NO	Test lines	Mean ± SE	Rating	Mean ± SE	Rating
1	RPNF-01	9.0 ± 0.00	S	NT
2	RPNF-02	6.1 ± 0.50	MR	5.87 ± 0.39	MS
3	RPNF-03	8.0 ± 0.41	MS	NT
4	RPNF-04	8.0 ± 0.41	MS	NT
5	RPNF-05	7.4 ± 0.46	MR	7.85 ± 0.32	S
6	RPNF-06	7.4 ± 0.54	MS	NT
7	RPNF-07	5.3 ± 0.45	MS	6.03 ± 0.44	MS
8	RPNF-08	7.6 ± 0.38	MS	NT
9	RPNF-09	5.8 ± 0.39	MS	6.76 ± 0.51	MS
10	RPNF-10	6.4 ± 0.41	S	NT
11	RPNF-11	9 ± 0.00	S	8.64 ± 0.36	S
D	Whitebacked planthopper (WBPH) under greenhouse screening at ABF
		WBPH (Damage score)
		2016		2017
S.NO	Test lines	Mean ± SE	Rating	Mean ± SE	Rating
1	RPNF-01	7.7 ± 0.30	S
2	RPNF-02	3.9 ± 0.20	MR	5.96 ± 0.38	MR
3	RPNF-03	6.6 ± 0.4	MS
4	RPNF-04	6.9 ± 0.4	MS
5	RPNF-05	4.3 ± 0.3	MR	5.08 ± 0.39	MR
6	RPNF-06	6.8 ± 0.4	MS
7	RPNF-07	6.0 ± 0.4	MS	7.97 ± 0.3	S
8	RPNF-08	6.5 ± 0.4	MS
9	RPNF-09	6.8 ± 0.3	MS	9.00 ± 0.0	S
10	RPNF-10	7.7 ± 0.4	S	8.94 ± 0.6	S
11	RPNF-11	8.4 ± 0.30	S	8.69 ± 0.15	S
E	Leaf folder (LF) under greenhouse screening at ABF
		Leaf folder (leaf area damage)
		2016		2017
S.NO	Test lines	Area (mm2) ± SE	Rating	Area (mm2) ± SE	Rating
1	RPNF-01	150.1 ± 17.48	S
2	RPNF-02	178.7 ± 22.68	S
3	RPNF-03	145.6 ± 16.09	S
4	RPNF-04	153.1 ± 18.52	S
5	RPNF-05	175.7 ± 20.31	S
6	RPNF-06	103.3 ± 8.48	MS	365.2 ± 33.70	S
7	RPNF-07	126.1 ± 32.60	S
8	RPNF-08	191.8 ± 45.26	S
9	RPNF-09	183.2 ± 24.26	S
10	RPNF-10	219.5 ± 49.49	S	205.4 ± 28.80	S
11	RPNF-11	139.6± 14.53	S	311.5 ± 26.45	S
F	Yellow stem borer (YSB) under field condition at ICAR-IIRR
		Stem borer
		2016			Rabi 2017			Karif 2017
S.NO	Test lines	DH(%)	WE(%)	Rating	DH(%)	Rating	WE (%)	WE(%)	Rating
1	RPNF-01	10	2.4	S	53.48±7.61	S	16.68±2.24	19.5± 3.34	S
2	RPNF-02	4.21	3.1	S	56.80±3.21	S	12.7±3.7	28.5± 1.49	S
3	RPNF-03	9.52	1.9	S	62.69±4.77	S	NT	NT	NT
4	RPNF-04	11.39	4.8	S	55.68±6.19	S	NT	26.86 ± 2.42	S
5	RPNF-05	10.45	2.3	S	55.34±3.37	S	NT	25.07± 2.12	S
6	RPNF-06	9.09	2.1	S	35.43±6.23	MS	26.67±8.69	22.99± 2.10	S
7	RPNF-07	NT	NT	NT	26.61±3.76	S	12.67±2.84	NT	NT
8	RPNF-08	NT	NT	NT	52.12±4.82	S	NT	NT	NT
9	RPNF-09	NT	NT	NT	32.26±2.10	MS	NT	NT	NT
10	RPNF-10				71.57±7.97	S	NT	NT	NT
11	RPNF-11				52.65±3.13	S	No flowering	No flowering	No flowering
		DH	Deadhearts
		WE	White ears
